# Supplementary material for: The surface stability and equilibrium crystal morphology of Ni2P nanoparticles and nanowires from an ab initio atomistic thermodynamic approach
Source: Royal Society of Chemistry journal article supplement (doi:10.1039/c6ce00584e), 2016-01-01
Supplement: c6ce00584e1.pdf [file c6ce00584e1.pdf]

# Supplementary Information “Surfaces Stability and Equilibrium Crystal Morphology of Ni<sub>2</sub>P Nanoparticle and Nanowires from *ab initio* atomistic thermodynamic approach”

Junjie He, Ángel Morales García, Ota Bludský, Petr Nachtigall\*

*Department of Physical and Macromolecular Chemistry, Faculty of Science, Charles University in  
Prague, 128 43 Prague 2, Czech Republic*

E-mail: [petr.nachtigall@natur.cuni.cz](mailto:petr.nachtigall@natur.cuni.cz)

## 1. Vibrational contribution to the Surface free energy.

The *ab initio* atomistic thermodynamics provide effective approach to evaluate upper limit of the vibrational contribution ( $\Delta\gamma^{vib}$ ) to surface free energies. The  $\Delta\gamma^{vib}$  term can be obtained from the difference between the surface and bulk vibrational mode plus contributions due to the excess or deficient atoms.

$$\Delta\gamma^{vib} \approx \frac{1}{2A} \left\{ \sum_{j=1}^{N_P^{surf}} \left[ F^{vib}(T, \omega_{i,j}^{surf}) - F^{vib}(T, \omega_{i,P}^{bulkNi_2P}) \right] + \sum_{j=1}^{N_{Ni}^{surf}} \left[ F^{vib}(T, \omega_{i,j}^{surf}) - F^{vib}(T, \omega_{i,Ni}^{bulkNi_2P}) \right] + \right. \\ \left. \left( \frac{1}{2} N_{Ni} - N_P \right) \left[ F^{vib}(T, \omega_{i,Ni}^{bulkNi_2P}) - F^{vib}(T, \omega_{i,Ni}^{bulkNi}) \right] \right\} \quad (10)$$

where  $N_P^{surf}$  and  $N_{Ni}^{surf}$  are the number of P and Ni, respectively, at the surface. An atom whose nearest neighbour coordination is changed with respect to the bulk structure are defined as the surface atoms.

The  $F^{vib}(T, \omega_{i,j}^{term})$  is defined as:

$$F^{vib}(T, \omega_{i,j}^{term}) = \sum_i^n \frac{1}{2} \hbar \omega_{i,j}^{term} + k_B T \ln(1 - e^{-\beta \hbar \omega_{i,j}^{term}}) \quad (11)$$

with  $\beta = 1/k_B T$ . The vibrational modes  $\omega_{i,j}^{surf}$ ,  $\omega_{i,P}^{bulkNi_2P}$ ,  $\omega_{i,Ni}^{bulkNi_2P}$  and  $\omega_{i,Ni}^{bulkNi}$  represent the surface atoms, Ni in the bulk Ni<sub>2</sub>P, P in the bulk Ni<sub>2</sub>P, and Ni in the bulk Ni structures, respectively, and the summation includes all degrees of freedom. To estimate  $\Delta\gamma^{vib}$ , we first calculate the bulk vibrational modes ( $\omega_{i,P}^{bulkNi_2P}$ ,  $\omega_{i,Ni}^{bulkNi_2P}$  and  $\omega_{i,Ni}^{bulkNi}$ ) based on frozen phonon calculations. The surface atoms ( $N_P^{surf}$  and  $N_{Ni}^{surf}$ ) are defined as atoms with changed nearest neighbour coordination with respect to the bulk structure. The characteristic frequencies of surface atom are calculated by considering the changing 50% for frequency of bulk atoms ( $\omega_{i,P}^{bulkNi_2P}$ ,  $\omega_{i,Ni}^{bulkNi_2P}$  and  $\omega_{i,Ni}^{bulkNi}$ ) as the upper limit of  $\Delta\gamma^{vib}$  contribution.

## 2. PDOS for Surface Atoms

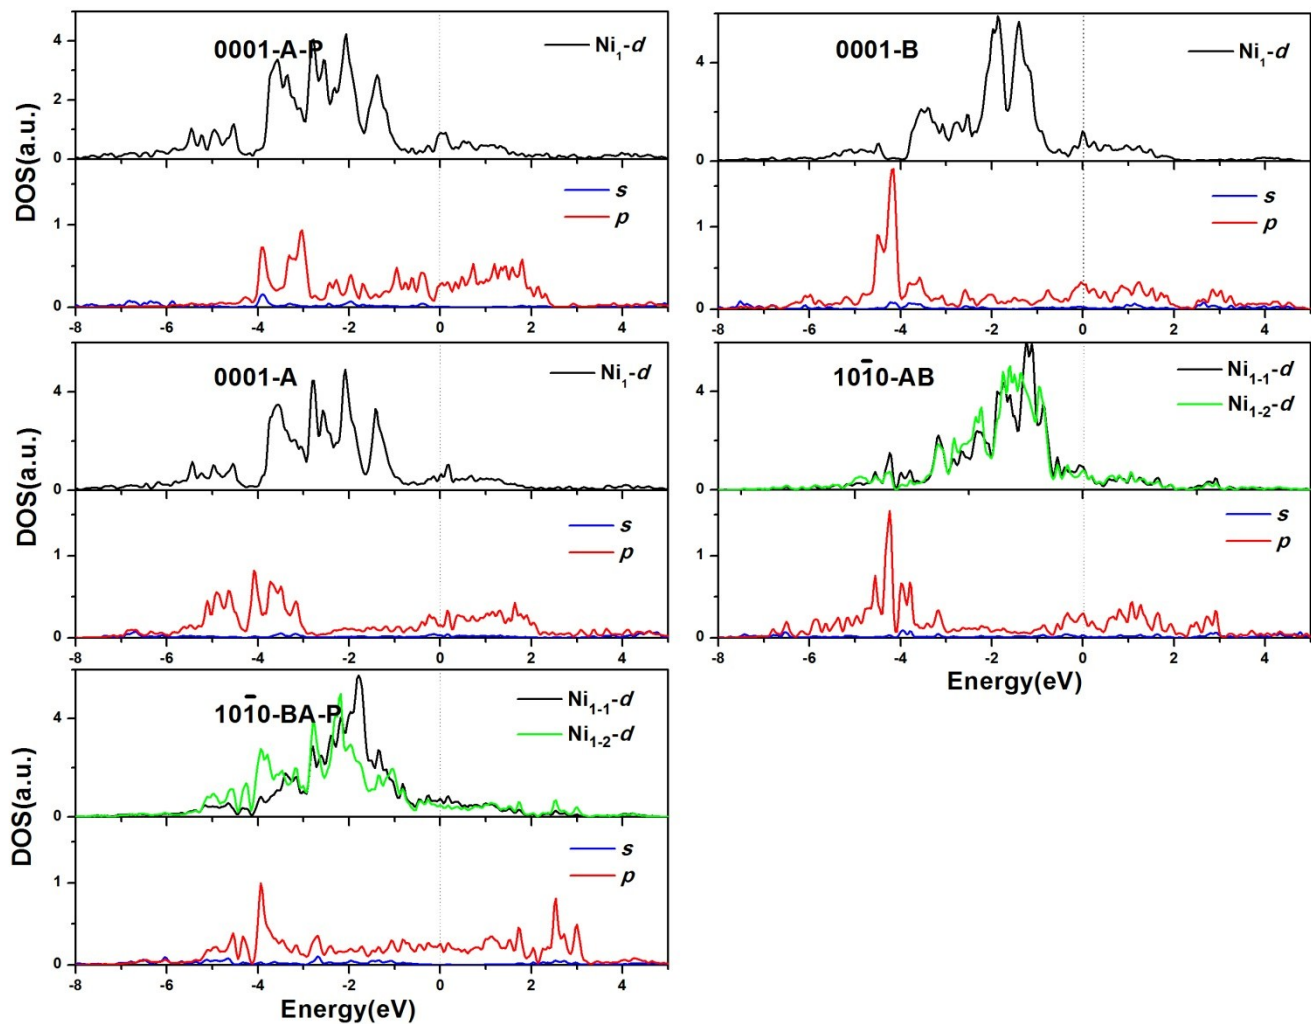

**Figure S1:** The partial electronic DOS ( $E_F=0$ ) of Ni and P atom for (0001)-A-P, (0001)-B, (0001)-A, ( $10\bar{1}0$ )-AB and ( $10\bar{1}0$ )-BA-P structures compared with bulk PDOS.

### 3. The structure parameters for the most stable termination.

**Table S1:** Calculated Structure of  $10\bar{1}0$ -AB model optimized PBE level.

**Unit cell**  $a=5.90239$ ,  $b=3.41236$ ,  $c=28.44182 \text{ \AA}$ ,  $\alpha=\beta=\gamma=90^\circ$ .

| Atom name | x       | y       | z       |
|-----------|---------|---------|---------|
| 1 P P1    | 0.50932 | 0.39396 | 0.48325 |
| 2 P P2    | 0.02643 | 0.39394 | 0.66228 |
| 3 P P3    | 0.52069 | 0.39395 | 0.84119 |

|       |      |         |         |         |
|-------|------|---------|---------|---------|
| 4 P   | P4   | 0.02072 | 0.39395 | 0.54327 |
| 5 P   | P5   | 0.52643 | 0.39394 | 0.72219 |
| 6 P   | P6   | 0.00925 | 0.39396 | 0.90121 |
| 7 P   | P7   | 0.00745 | 0.89395 | 0.42321 |
| 8 P   | P8   | 0.52336 | 0.89395 | 0.60300 |
| 9 P   | P9   | 0.02336 | 0.89395 | 0.78146 |
| 10 P  | P10  | 0.50742 | 0.89396 | 0.96126 |
| 11 Ni | Ni1  | 0.88229 | 0.39396 | 0.47094 |
| 12 Ni | Ni2  | 0.39677 | 0.39394 | 0.64898 |
| 13 Ni | Ni3  | 0.89216 | 0.39395 | 0.82777 |
| 14 Ni | Ni4  | 0.25231 | 0.39395 | 0.42850 |
| 15 Ni | Ni5  | 0.78383 | 0.39394 | 0.60336 |
| 16 Ni | Ni6  | 0.28384 | 0.39394 | 0.78111 |
| 17 Ni | Ni7  | 0.75223 | 0.39395 | 0.95597 |
| 18 Ni | Ni8  | 0.39216 | 0.39394 | 0.55670 |
| 19 Ni | Ni9  | 0.89677 | 0.39394 | 0.73549 |
| 20 Ni | Ni10 | 0.38227 | 0.39396 | 0.91352 |
| 21 Ni | Ni11 | 0.72850 | 0.89395 | 0.53460 |
| 22 Ni | Ni12 | 0.22554 | 0.89394 | 0.71053 |
| 23 Ni | Ni13 | 0.69629 | 0.89396 | 0.88535 |
| 24 Ni | Ni14 | 0.60927 | 0.89396 | 0.43988 |
| 25 Ni | Ni15 | 0.12753 | 0.89394 | 0.60354 |
| 26 Ni | Ni16 | 0.62755 | 0.89394 | 0.78092 |
| 27 Ni | Ni17 | 0.10922 | 0.89396 | 0.94459 |
| 28 Ni | Ni18 | 0.19631 | 0.89395 | 0.49912 |
| 29 Ni | Ni19 | 0.72554 | 0.89394 | 0.67394 |
| 30 Ni | Ni20 | 0.22850 | 0.89395 | 0.84986 |

**Table S2:** The surface structure of 10<sup>10</sup>-BA-P optimized in PBE level.

**Unit cell** a=5.90239, b=3.41236, c=8.44182 Å,  $\alpha=\beta=\gamma=90^\circ$ .

| Atom name |    | x       | y        | z       |
|-----------|----|---------|----------|---------|
| 1 P       | P1 | 0.16938 | 0.00000  | 0.16356 |
| 2 P       | P2 | 0.50733 | 0.00000  | 0.29614 |
| 3 P       | P3 | 0.00000 | 0.00000  | 0.43648 |
| 4 P       | P4 | 0.50112 | 0.00000  | 0.57757 |
| 5 P       | P5 | 0.01170 | -0.00000 | 0.71982 |
| 6 P       | P6 | 0.51169 | 0.00000  | 0.20046 |
| 7 P       | P7 | 0.00116 | -0.00000 | 0.34271 |
| 8 P       | P8 | 0.50000 | 0.00000  | 0.48381 |

|       |      |          |          |         |
|-------|------|----------|----------|---------|
| 9 P   | P9   | 0.00734  | -0.00000 | 0.62414 |
| 10 P  | P10  | 0.66938  | -0.00000 | 0.75674 |
| 11 P  | P11  | -0.00316 | 0.50000  | 0.24851 |
| 12 P  | P12  | 0.50000  | 0.50000  | 0.38915 |
| 13 P  | P13  | 0.00000  | 0.50000  | 0.53114 |
| 14 P  | P14  | 0.49683  | 0.50000  | 0.67178 |
| 15 Ni | Ni1  | 0.87262  | 0.00000  | 0.28512 |
| 16 Ni | Ni2  | 0.37034  | 0.00000  | 0.42597 |
| 17 Ni | Ni3  | 0.87097  | 0.00000  | 0.56732 |
| 18 Ni | Ni4  | 0.39498  | -0.00000 | 0.71021 |
| 19 Ni | Ni5  | 0.26243  | 0.00000  | 0.25173 |
| 20 Ni | Ni6  | 0.75932  | 0.00000  | 0.38915 |
| 21 Ni | Ni7  | 0.25932  | 0.00000  | 0.53114 |
| 22 Ni | Ni8  | 0.76238  | -0.00000 | 0.66857 |
| 23 Ni | Ni9  | 0.89499  | 0.00000  | 0.21008 |
| 24 Ni | Ni10 | 0.37100  | -0.00000 | 0.35296 |
| 25 Ni | Ni11 | 0.87034  | 0.00000  | 0.49432 |
| 26 Ni | Ni12 | 0.37259  | -0.00000 | 0.63516 |
| 27 Ni | Ni13 | 0.25197  | 0.50000  | 0.20094 |
| 28 Ni | Ni14 | 0.69394  | 0.50000  | 0.33275 |
| 29 Ni | Ni15 | 0.19911  | 0.50000  | 0.47459 |
| 30 Ni | Ni16 | 0.68851  | 0.50000  | 0.61388 |
| 31 Ni | Ni17 | 0.60793  | 0.50000  | 0.25031 |
| 32 Ni | Ni18 | 0.10179  | 0.50000  | 0.38915 |
| 33 Ni | Ni19 | 0.60179  | 0.50000  | 0.53114 |
| 34 Ni | Ni20 | 0.10791  | 0.50000  | 0.66997 |
| 35 Ni | Ni21 | 0.18852  | 0.50000  | 0.30640 |
| 36 Ni | Ni22 | 0.69911  | 0.50000  | 0.44569 |
| 37 Ni | Ni23 | 0.19395  | 0.50000  | 0.58753 |
| 38 Ni | Ni24 | 0.75191  | 0.50000  | 0.71934 |

**Table S3:** The surface structure of 0001-A optimized in PBE level.

**Unit cell** a=5.90239, b=5.90239, c=30.47416 Å,  $\alpha=\beta=90^\circ$ ,  $\gamma=120^\circ$ .

|     | <b>Atom name</b> | <b>x</b> | <b>y</b> | <b>z</b> |
|-----|------------------|----------|----------|----------|
| 1 P | P1               | 0.33333  | 0.66667  | 0.00319  |
| 2 P | P2               | 0.66667  | 0.33333  | 0.00319  |
| 3 P | P3               | 0.00000  | 0.00000  | 0.05790  |
| 4 P | P4               | 0.33333  | 0.66667  | 0.11287  |
| 5 P | P5               | 0.66667  | 0.33333  | 0.11287  |
| 6 P | P6               | -0.00000 | 1.00000  | 0.16911  |
| 7 P | P7               | 0.33333  | 0.66667  | 0.22395  |

|       |      |          |          |         |
|-------|------|----------|----------|---------|
| 8 P   | P8   | 0.66667  | 0.33333  | 0.22395 |
| 9 P   | P9   | 0.00000  | 0.00000  | 0.27994 |
| 10 P  | P10  | 0.33333  | 0.66667  | 0.33593 |
| 11 P  | P11  | 0.66667  | 0.33333  | 0.33593 |
| 12 P  | P12  | 0.00000  | 1.00000  | 0.39077 |
| 13 P  | P13  | 0.33333  | 0.66667  | 0.44702 |
| 14 P  | P14  | 0.66667  | 0.33334  | 0.44702 |
| 15 P  | P15  | 0.00000  | 0.00000  | 0.50198 |
| 16 P  | P16  | 0.33333  | 0.66667  | 0.55670 |
| 17 P  | P17  | 0.66667  | 0.33333  | 0.55670 |
| 18 Ni | Ni1  | 0.26633  | -0.00000 | 0.00828 |
| 19 Ni | Ni2  | -0.00000 | 0.26633  | 0.00828 |
| 20 Ni | Ni3  | 0.73367  | 0.73367  | 0.00828 |
| 21 Ni | Ni4  | 0.60227  | 0.00000  | 0.06049 |
| 22 Ni | Ni5  | 0.00000  | 0.60227  | 0.06049 |
| 23 Ni | Ni6  | 0.39773  | 0.39773  | 0.06049 |
| 24 Ni | Ni7  | 0.25977  | 0.00000  | 0.11476 |
| 25 Ni | Ni8  | 0.00000  | 0.25977  | 0.11476 |
| 26 Ni | Ni9  | 0.74023  | 0.74023  | 0.11476 |
| 27 Ni | Ni10 | 0.60250  | 0.00000  | 0.16926 |
| 28 Ni | Ni11 | 0.00000  | 0.60250  | 0.16926 |
| 29 Ni | Ni12 | 0.39750  | 0.39750  | 0.16926 |
| 30 Ni | Ni13 | 0.25932  | 0.00000  | 0.22395 |
| 31 Ni | Ni14 | 0.00000  | 0.25932  | 0.22395 |
| 32 Ni | Ni15 | 0.74068  | 0.74068  | 0.22395 |
| 33 Ni | Ni16 | 0.60179  | 0.00000  | 0.27994 |
| 34 Ni | Ni17 | 0.00000  | 0.60179  | 0.27994 |
| 35 Ni | Ni18 | 0.39821  | 0.39821  | 0.27994 |
| 36 Ni | Ni19 | 0.25932  | 0.00000  | 0.33593 |
| 37 Ni | Ni20 | 0.00000  | 0.25932  | 0.33593 |
| 38 Ni | Ni21 | 0.74068  | 0.74068  | 0.33593 |
| 39 Ni | Ni22 | 0.60249  | -0.00000 | 0.39062 |
| 40 Ni | Ni23 | 0.00000  | 0.60249  | 0.39062 |
| 41 Ni | Ni24 | 0.39751  | 0.39751  | 0.39062 |
| 42 Ni | Ni25 | 0.25977  | 0.00000  | 0.44512 |
| 43 Ni | Ni26 | 1.00000  | 0.25976  | 0.44512 |
| 44 Ni | Ni27 | 0.74023  | 0.74023  | 0.44512 |
| 45 Ni | Ni28 | 0.60226  | -0.00000 | 0.49940 |
| 46 Ni | Ni29 | 1.00000  | 0.60226  | 0.49940 |
| 47 Ni | Ni30 | 0.39774  | 0.39774  | 0.49940 |
| 48 Ni | Ni31 | 0.26633  | 0.00000  | 0.55161 |
| 49 Ni | Ni32 | -0.00000 | 0.26633  | 0.55161 |
| 50 Ni | Ni33 | 0.73367  | 0.73367  | 0.55161 |

**Table S4:** The surface structure of 0001-A-P optimized in PBE level.**Unit cell** a=5.90239, b=5.90239, c=33.60000 Å,  $\alpha=\beta=90^\circ$ ,  $\gamma=120^\circ$ .

| <b>Atom name</b> | <b>x</b> | <b>y</b> | <b>z</b> |
|------------------|----------|----------|----------|
| 1 P P1           | 1.00000  | 0.00000  | 0.05959  |
| 2 P P2           | 0.33333  | 0.66667  | 0.10390  |
| 3 P P3           | 0.66667  | 0.33333  | 0.10390  |
| 4 P P4           | 1.00000  | 0.00000  | 0.15488  |
| 5 P P5           | 0.33333  | 0.66667  | 0.20425  |
| 6 P P6           | 0.66667  | 0.33333  | 0.20425  |
| 7 P P7           | 1.00000  | 0.00000  | 0.25496  |
| 8 P P8           | 0.33333  | 0.66667  | 0.30467  |
| 9 P P9           | 0.66667  | 0.33333  | 0.30467  |
| 10 P P10         | 0.00000  | 0.00000  | 0.35545  |
| 11 P P11         | 0.33333  | 0.66667  | 0.40623  |
| 12 P P12         | 0.66667  | 0.33333  | 0.40623  |
| 13 P P13         | -0.00000 | -0.00000 | 0.45595  |
| 14 P P14         | 0.33333  | 0.66667  | 0.50666  |
| 15 P P15         | 0.66667  | 0.33333  | 0.50666  |
| 16 P P16         | 1.00000  | 0.00000  | 0.55603  |
| 17 P P17         | 0.33333  | 0.66667  | 0.60701  |
| 18 P P18         | 0.66667  | 0.33333  | 0.60701  |
| 19 P P19         | 1.00000  | 0.00000  | 0.65132  |
| 20 Ni Ni1        | 0.26161  | 0.00000  | 0.10646  |
| 21 Ni Ni2        | 1.00000  | 0.26161  | 0.10646  |
| 22 Ni Ni3        | 0.73839  | 0.73839  | 0.10646  |
| 23 Ni Ni4        | 0.60239  | 0.00000  | 0.15578  |
| 24 Ni Ni5        | 1.00000  | 0.60239  | 0.15578  |
| 25 Ni Ni6        | 0.39761  | 0.39761  | 0.15578  |
| 26 Ni Ni7        | 0.26084  | 0.00000  | 0.20527  |
| 27 Ni Ni8        | 1.00000  | 0.26084  | 0.20527  |
| 28 Ni Ni9        | 0.73916  | 0.73916  | 0.20527  |
| 29 Ni Ni10       | 0.60301  | 0.00000  | 0.25472  |
| 30 Ni Ni11       | 1.00000  | 0.60301  | 0.25472  |
| 31 Ni Ni12       | 0.39699  | 0.39699  | 0.25472  |
| 32 Ni Ni13       | 0.25932  | 0.00000  | 0.30467  |
| 33 Ni Ni14       | 0.00000  | 0.25932  | 0.30467  |
| 34 Ni Ni15       | 0.74068  | 0.74068  | 0.30467  |
| 35 Ni Ni16       | 0.60179  | 0.00000  | 0.35545  |
| 36 Ni Ni17       | 0.00000  | 0.60179  | 0.35545  |
| 37 Ni Ni18       | 0.39821  | 0.39821  | 0.35545  |
| 38 Ni Ni19       | 0.25932  | 0.00000  | 0.40623  |
| 39 Ni Ni20       | 0.00000  | 0.25932  | 0.40623  |

|            |         |         |         |
|------------|---------|---------|---------|
| 40 Ni Ni21 | 0.74068 | 0.74068 | 0.40623 |
| 41 Ni Ni22 | 0.60301 | 0.00000 | 0.45619 |
| 42 Ni Ni23 | 1.00000 | 0.60302 | 0.45619 |
| 43 Ni Ni24 | 0.39698 | 0.39699 | 0.45619 |
| 44 Ni Ni25 | 0.26084 | 0.00000 | 0.50564 |
| 45 Ni Ni26 | 1.00000 | 0.26085 | 0.50564 |
| 46 Ni Ni27 | 0.73915 | 0.73915 | 0.50564 |
| 47 Ni Ni28 | 0.60240 | 0.00000 | 0.55513 |
| 48 Ni Ni29 | 1.00000 | 0.60240 | 0.55513 |
| 49 Ni Ni30 | 0.39760 | 0.39760 | 0.55513 |
| 50 Ni Ni31 | 0.26161 | 0.00000 | 0.60445 |
| 51 Ni Ni32 | 1.00000 | 0.26161 | 0.60445 |
| 52 Ni Ni33 | 0.73839 | 0.73839 | 0.60445 |

**Table S5:** The surface structure of 0001-B optimized in PBE level.

**Unit cell** a=5.90239, b=5.90239, c=30.71124 Å,  $\alpha=\beta=90^\circ$ ,  $\gamma=120^\circ$ .

| <b>Atom name</b> | <b>x</b> | <b>y</b> | <b>z</b> |
|------------------|----------|----------|----------|
| 1 P P1           | 1.00000  | 1.00000  | 0.05591  |
| 2 P P2           | 0.33333  | 0.66667  | 0.11023  |
| 3 P P3           | 0.66666  | 0.33333  | 0.11023  |
| 4 P P4           | 1.00000  | -0.00000 | 0.16913  |
| 5 P P5           | 0.33333  | 0.66667  | 0.22266  |
| 6 P P6           | 0.66667  | 0.33333  | 0.22266  |
| 7 P P7           | 0.00000  | 0.00000  | 0.27778  |
| 8 P P8           | 0.33333  | 0.66667  | 0.33333  |
| 9 P P9           | 0.66667  | 0.33333  | 0.33333  |
| 10 P P10         | 0.00000  | 0.00000  | 0.38889  |
| 11 P P11         | 0.33333  | 0.66667  | 0.44402  |
| 12 P P12         | 0.66667  | 0.33333  | 0.44402  |
| 13 P P13         | 1.00000  | 1.00000  | 0.49756  |
| 14 P P14         | 0.33333  | 0.66667  | 0.55646  |
| 15 P P15         | 0.66667  | 0.33333  | 0.55646  |
| 16 P P16         | 1.00000  | 1.00000  | 0.61078  |
| 17 Ni Ni1        | 0.61850  | -0.00000 | 0.06798  |
| 18 Ni Ni2        | -0.00000 | 0.61850  | 0.06798  |
| 19 Ni Ni3        | 0.38150  | 0.38150  | 0.06798  |
| 20 Ni Ni4        | 0.25987  | -0.00000 | 0.11641  |
| 21 Ni Ni5        | -0.00000 | 0.25987  | 0.11641  |
| 22 Ni Ni6        | 0.74013  | 0.74013  | 0.11641  |
| 23 Ni Ni7        | 0.60159  | 1.00000  | 0.16944  |
| 24 Ni Ni8        | 1.00000  | 0.60159  | 0.16944  |
| 25 Ni Ni9        | 0.39841  | 0.39841  | 0.16944  |



|            |          |          |         |
|------------|----------|----------|---------|
| 26 Ni Ni10 | 0.26072  | -0.00000 | 0.22355 |
| 27 Ni Ni11 | -0.00000 | 0.26072  | 0.22355 |
| 28 Ni Ni12 | 0.73928  | 0.73928  | 0.22355 |
| 29 Ni Ni13 | 0.60179  | 0.00000  | 0.27778 |
| 30 Ni Ni14 | 0.00000  | 0.60179  | 0.27778 |
| 31 Ni Ni15 | 0.39821  | 0.39821  | 0.27778 |
| 32 Ni Ni16 | 0.25932  | 0.00000  | 0.33333 |
| 33 Ni Ni17 | 0.00000  | 0.25932  | 0.33333 |
| 34 Ni Ni18 | 0.74068  | 0.74068  | 0.33333 |
| 35 Ni Ni19 | 0.60179  | 0.00000  | 0.38889 |
| 36 Ni Ni20 | 0.00000  | 0.60179  | 0.38889 |
| 37 Ni Ni21 | 0.39821  | 0.39821  | 0.38889 |
| 38 Ni Ni22 | 0.26071  | -0.00000 | 0.44313 |
| 39 Ni Ni23 | -0.00000 | 0.26071  | 0.44313 |
| 40 Ni Ni24 | 0.73929  | 0.73929  | 0.44313 |
| 41 Ni Ni25 | 0.60158  | 1.00000  | 0.49726 |
| 42 Ni Ni26 | 1.00000  | 0.60158  | 0.49726 |
| 43 Ni Ni27 | 0.39842  | 0.39842  | 0.49726 |
| 44 Ni Ni28 | 0.25986  | -0.00000 | 0.55028 |
| 45 Ni Ni29 | 1.00000  | 0.25986  | 0.55028 |
| 46 Ni Ni30 | 0.74014  | 0.74014  | 0.55028 |
| 47 Ni Ni31 | 0.61849  | -0.00000 | 0.59871 |
| 48 Ni Ni32 | 1.00000  | 0.61849  | 0.59871 |
| 49 Ni Ni33 | 0.38151  | 0.38151  | 0.59871 |

**Table S6:** The surface structure of  $10^{12}$ -NiP<sub>2</sub> optimized in PBE level.

**Unit cell** a= 17.05350, b=5.90239, c=24.0000 Å,  $\alpha=\beta=\gamma=90^\circ$ .

| Atom name | x       | y       | z       |
|-----------|---------|---------|---------|
| 1 P P1    | 0.77995 | 0.94218 | 0.25340 |
| 2 P P2    | 0.61003 | 0.43747 | 0.07863 |
| 3 P P3    | 0.95967 | 0.41918 | 0.42210 |
| 4 P P4    | 0.58008 | 0.94215 | 0.18238 |
| 5 P P5    | 0.40001 | 0.44288 | 0.01383 |
| 6 P P6    | 0.76101 | 0.43618 | 0.35526 |
| 7 P P7    | 0.62414 | 0.94555 | 0.33824 |
| 8 P P8    | 0.44274 | 0.43817 | 0.16887 |
| 9 P P9    | 0.27995 | 0.44218 | 0.25340 |
| 10 P P10  | 0.11003 | 0.93730 | 0.07854 |
| 11 P P11  | 0.45956 | 0.91885 | 0.42214 |
| 12 P P12  | 0.08008 | 0.44215 | 0.18238 |
| 13 P P13  | 0.89996 | 0.94270 | 0.01385 |

|       |      |         |         |         |
|-------|------|---------|---------|---------|
| 14 P  | P14  | 0.26115 | 0.93648 | 0.35547 |
| 15 P  | P15  | 0.12477 | 0.44533 | 0.33846 |
| 16 P  | P16  | 0.94280 | 0.93807 | 0.16890 |
| 17 P  | P17  | 0.21934 | 0.93982 | 0.19835 |
| 18 P  | P18  | 0.38993 | 0.43718 | 0.37229 |
| 19 P  | P19  | 0.04073 | 0.41813 | 0.02820 |
| 20 P  | P20  | 0.41992 | 0.94215 | 0.26762 |
| 21 P  | P21  | 0.60007 | 0.44318 | 0.43644 |
| 22 P  | P22  | 0.23921 | 0.43551 | 0.09529 |
| 23 P  | P23  | 0.37541 | 0.94503 | 0.11220 |
| 24 P  | P24  | 0.55681 | 0.43843 | 0.28148 |
| 25 P  | P25  | 0.71934 | 0.43984 | 0.19842 |
| 26 P  | P26  | 0.88937 | 0.93692 | 0.37240 |
| 27 P  | P27  | 0.54076 | 0.91820 | 0.02824 |
| 28 P  | P28  | 0.91992 | 0.44215 | 0.26762 |
| 29 P  | P29  | 0.10008 | 0.94287 | 0.43663 |
| 30 P  | P30  | 0.73921 | 0.93560 | 0.09536 |
| 31 P  | P31  | 0.87543 | 0.44485 | 0.11220 |
| 32 P  | P32  | 0.05697 | 0.93995 | 0.28167 |
| 33 Ni | Ni1  | 0.61391 | 0.07732 | 0.09668 |
| 34 Ni | Ni2  | 0.97888 | 0.05666 | 0.42743 |
| 35 Ni | Ni3  | 0.47094 | 0.20744 | 0.07463 |
| 36 Ni | Ni4  | 0.84135 | 0.24762 | 0.41155 |
| 37 Ni | Ni5  | 0.58008 | 0.34039 | 0.18238 |
| 38 Ni | Ni6  | 0.69062 | 0.24201 | 0.28450 |
| 39 Ni | Ni7  | 0.50984 | 0.74444 | 0.11915 |
| 40 Ni | Ni8  | 0.65259 | 0.75283 | 0.25056 |
| 41 Ni | Ni9  | 0.41249 | 0.83042 | 0.02938 |
| 42 Ni | Ni10 | 0.75840 | 0.84119 | 0.34792 |
| 43 Ni | Ni11 | 0.32028 | 0.18208 | 0.05459 |
| 44 Ni | Ni12 | 0.45341 | 0.07183 | 0.18081 |
| 45 Ni | Ni13 | 0.84187 | 0.17954 | 0.30732 |
| 46 Ni | Ni14 | 0.70675 | 0.07183 | 0.18396 |
| 47 Ni | Ni15 | 0.21818 | 0.08320 | 0.43164 |
| 48 Ni | Ni16 | 0.86752 | 0.06410 | 0.10421 |
| 49 Ni | Ni17 | 0.11396 | 0.57723 | 0.09665 |
| 50 Ni | Ni18 | 0.47884 | 0.55645 | 0.42790 |
| 51 Ni | Ni19 | 0.97094 | 0.70723 | 0.07460 |
| 52 Ni | Ni20 | 0.34134 | 0.74698 | 0.41161 |
| 53 Ni | Ni21 | 0.08008 | 0.84039 | 0.18238 |
| 54 Ni | Ni22 | 0.19151 | 0.74212 | 0.28478 |
| 55 Ni | Ni23 | 0.00967 | 0.24502 | 0.11911 |
| 56 Ni | Ni24 | 0.15163 | 0.24308 | 0.25027 |
| 57 Ni | Ni25 | 0.91241 | 0.33031 | 0.02934 |
| 58 Ni | Ni26 | 0.25860 | 0.34120 | 0.34802 |

|            |         |         |         |
|------------|---------|---------|---------|
| 59 Ni Ni27 | 0.82026 | 0.68197 | 0.05464 |
| 60 Ni Ni28 | 0.95341 | 0.57183 | 0.18081 |
| 61 Ni Ni29 | 0.34191 | 0.67964 | 0.30729 |
| 62 Ni Ni30 | 0.20675 | 0.57183 | 0.18396 |
| 63 Ni Ni31 | 0.71810 | 0.58323 | 0.43138 |
| 64 Ni Ni32 | 0.36749 | 0.56428 | 0.10419 |
| 65 Ni Ni33 | 0.38628 | 0.07747 | 0.35350 |
| 66 Ni Ni34 | 0.02142 | 0.05554 | 0.02240 |
| 67 Ni Ni35 | 0.52910 | 0.20800 | 0.37561 |
| 68 Ni Ni36 | 0.15902 | 0.24598 | 0.03911 |
| 69 Ni Ni37 | 0.41992 | 0.34039 | 0.26762 |
| 70 Ni Ni38 | 0.30955 | 0.24289 | 0.16615 |
| 71 Ni Ni39 | 0.49087 | 0.74642 | 0.33106 |
| 72 Ni Ni40 | 0.34837 | 0.74308 | 0.19973 |
| 73 Ni Ni41 | 0.58787 | 0.83067 | 0.42111 |
| 74 Ni Ni42 | 0.24179 | 0.84121 | 0.10296 |
| 75 Ni Ni43 | 0.67967 | 0.18268 | 0.39568 |
| 76 Ni Ni44 | 0.54659 | 0.07183 | 0.26919 |
| 77 Ni Ni45 | 0.15882 | 0.17878 | 0.14342 |
| 78 Ni Ni46 | 0.29325 | 0.07183 | 0.26604 |
| 79 Ni Ni47 | 0.78183 | 0.08306 | 0.01921 |
| 80 Ni Ni48 | 0.13288 | 0.06489 | 0.34616 |
| 81 Ni Ni49 | 0.88626 | 0.57765 | 0.35344 |
| 82 Ni Ni50 | 0.52148 | 0.55560 | 0.02239 |
| 83 Ni Ni51 | 0.02937 | 0.70702 | 0.37580 |
| 84 Ni Ni52 | 0.65906 | 0.74607 | 0.03921 |
| 85 Ni Ni53 | 0.91992 | 0.84039 | 0.26762 |
| 86 Ni Ni54 | 0.80962 | 0.74279 | 0.16618 |
| 87 Ni Ni55 | 0.99166 | 0.25032 | 0.33096 |
| 88 Ni Ni56 | 0.84837 | 0.24308 | 0.19973 |
| 89 Ni Ni57 | 0.08802 | 0.33077 | 0.42139 |
| 90 Ni Ni58 | 0.74182 | 0.34113 | 0.10302 |
| 91 Ni Ni59 | 0.17995 | 0.68259 | 0.39605 |
| 92 Ni Ni60 | 0.04892 | 0.57420 | 0.26911 |
| 93 Ni Ni61 | 0.65888 | 0.67865 | 0.14362 |
| 94 Ni Ni62 | 0.79325 | 0.57183 | 0.26604 |
| 95 Ni Ni63 | 0.28185 | 0.58319 | 0.01916 |
| 96 Ni Ni64 | 0.63275 | 0.56503 | 0.34575 |
| 97 Ni Ni65 | 0.00000 | 0.18285 | 0.22500 |
| 98 Ni Ni66 | 0.50000 | 0.68285 | 0.22500 |

**Table S7:** The surface structure of  $10^{13}$ -NiP<sub>2</sub> optimized in PBE level.

Unit cell  $a=22.88473$ ,  $b=5.90239$ ,  $c=20.8000$  Å,  $\alpha=\beta=\gamma=90^\circ$ .

| Atom name | x       | y       | z       |
|-----------|---------|---------|---------|
| 1 P P1    | 0.16779 | 0.97711 | 0.06395 |
| 2 P P2    | 0.03519 | 0.97546 | 0.13521 |
| 3 P P3    | 0.90004 | 0.97950 | 0.20716 |
| 4 P P4    | 0.76663 | 0.97950 | 0.28045 |
| 5 P P5    | 0.63479 | 0.00639 | 0.35708 |
| 6 P P6    | 0.47434 | 0.98617 | 0.44335 |
| 7 P P7    | 0.08915 | 0.03578 | 0.45591 |
| 8 P P8    | 0.23030 | 0.99473 | 0.39456 |
| 9 P P9    | 0.36558 | 0.98017 | 0.31873 |
| 10 P P10  | 0.66781 | 0.47698 | 0.06408 |
| 11 P P11  | 0.53521 | 0.47562 | 0.13515 |
| 12 P P12  | 0.40004 | 0.47950 | 0.20716 |
| 13 P P13  | 0.26663 | 0.47950 | 0.28045 |
| 14 P P14  | 0.13487 | 0.50748 | 0.35721 |
| 15 P P15  | 0.97383 | 0.48535 | 0.44358 |
| 16 P P16  | 0.58912 | 0.53492 | 0.45602 |
| 17 P P17  | 0.73003 | 0.49427 | 0.39423 |
| 18 P P18  | 0.86563 | 0.48014 | 0.31882 |
| 19 P P19  | 0.83221 | 0.97681 | 0.42346 |
| 20 P P20  | 0.96509 | 0.97516 | 0.35225 |
| 21 P P21  | 0.10151 | 0.98158 | 0.28017 |
| 22 P P22  | 0.23337 | 0.97950 | 0.20716 |
| 23 P P23  | 0.36526 | 0.00642 | 0.13049 |
| 24 P P24  | 0.52582 | 0.98598 | 0.04424 |
| 25 P P25  | 0.91094 | 0.03492 | 0.03160 |
| 26 P P26  | 0.77000 | 0.99438 | 0.09333 |
| 27 P P27  | 0.63449 | 0.98009 | 0.16882 |
| 28 P P28  | 0.33236 | 0.47722 | 0.42356 |
| 29 P P29  | 0.46486 | 0.47576 | 0.35245 |
| 30 P P30  | 0.59996 | 0.47950 | 0.28045 |
| 31 P P31  | 0.73337 | 0.47950 | 0.20716 |
| 32 P P32  | 0.86524 | 0.50639 | 0.13049 |
| 33 P P33  | 0.02579 | 0.48583 | 0.04422 |
| 34 P P34  | 0.41098 | 0.53496 | 0.03160 |
| 35 P P35  | 0.27003 | 0.49437 | 0.09333 |
| 36 P P36  | 0.13445 | 0.48029 | 0.16870 |
| 37 P P37  | 0.50000 | 0.97947 | 0.24380 |
| 38 P P38  | 0.00000 | 0.47947 | 0.24380 |
| 39 Ni Ni1 | 0.67955 | 0.11752 | 0.08217 |
| 40 Ni Ni2 | 0.53934 | 0.09349 | 0.14980 |
| 41 Ni Ni3 | 0.40742 | 0.10915 | 0.22343 |

|            |          |         |         |
|------------|----------|---------|---------|
| 42 Ni Ni4  | 0.27339  | 0.10628 | 0.29408 |
| 43 Ni Ni5  | 0.14093  | 0.13830 | 0.36872 |
| 44 Ni Ni6  | -0.00200 | 0.12029 | 0.44077 |
| 45 Ni Ni7  | 0.58053  | 0.30734 | 0.05556 |
| 46 Ni Ni8  | 0.44496  | 0.31607 | 0.11536 |
| 47 Ni Ni9  | 0.30781  | 0.29747 | 0.18435 |
| 48 Ni Ni10 | 0.17314  | 0.28040 | 0.25807 |
| 49 Ni Ni11 | 0.03784  | 0.24604 | 0.32276 |
| 50 Ni Ni12 | 0.90084  | 0.25522 | 0.39881 |
| 51 Ni Ni13 | 0.65633  | 0.27204 | 0.42494 |
| 52 Ni Ni14 | 0.79655  | 0.22906 | 0.35490 |
| 53 Ni Ni15 | 0.93330  | 0.22016 | 0.28045 |
| 54 Ni Ni16 | 0.07096  | 0.41618 | 0.43073 |
| 55 Ni Ni17 | 0.23129  | 0.38780 | 0.37894 |
| 56 Ni Ni18 | 0.36471  | 0.37932 | 0.31255 |
| 57 Ni Ni19 | 0.17960  | 0.61764 | 0.08208 |
| 58 Ni Ni20 | 0.03930  | 0.59342 | 0.14978 |
| 59 Ni Ni21 | 0.90742  | 0.60915 | 0.22343 |
| 60 Ni Ni22 | 0.77348  | 0.60627 | 0.29401 |
| 61 Ni Ni23 | 0.64052  | 0.63686 | 0.36842 |
| 62 Ni Ni24 | 0.49803  | 0.62070 | 0.44093 |
| 63 Ni Ni25 | 0.08051  | 0.80728 | 0.05557 |
| 64 Ni Ni26 | 0.94492  | 0.81599 | 0.11533 |
| 65 Ni Ni27 | 0.80782  | 0.79744 | 0.18432 |
| 66 Ni Ni28 | 0.67314  | 0.78040 | 0.25807 |
| 67 Ni Ni29 | 0.53762  | 0.74773 | 0.32300 |
| 68 Ni Ni30 | 0.40094  | 0.75604 | 0.39891 |
| 69 Ni Ni31 | 0.15652  | 0.77296 | 0.42508 |
| 70 Ni Ni32 | 0.29671  | 0.72929 | 0.35495 |
| 71 Ni Ni33 | 0.43330  | 0.72016 | 0.28045 |
| 72 Ni Ni34 | 0.57144  | 0.91521 | 0.43116 |
| 73 Ni Ni35 | 0.73098  | 0.88715 | 0.37874 |
| 74 Ni Ni36 | 0.86473  | 0.87914 | 0.31256 |
| 75 Ni Ni37 | 0.32072  | 0.11768 | 0.40544 |
| 76 Ni Ni38 | 0.46069  | 0.09363 | 0.33780 |
| 77 Ni Ni39 | 0.59258  | 0.10915 | 0.26417 |
| 78 Ni Ni40 | 0.72659  | 0.10623 | 0.19357 |
| 79 Ni Ni41 | 0.85952  | 0.13686 | 0.11919 |
| 80 Ni Ni42 | 0.00207  | 0.12030 | 0.04670 |
| 81 Ni Ni43 | 0.41965  | 0.30757 | 0.43213 |
| 82 Ni Ni44 | 0.55508  | 0.31604 | 0.37229 |
| 83 Ni Ni45 | 0.69221  | 0.29754 | 0.30322 |
| 84 Ni Ni46 | 0.82686  | 0.28040 | 0.22954 |
| 85 Ni Ni47 | 0.96245  | 0.24734 | 0.16465 |
| 86 Ni Ni48 | 0.09918  | 0.25580 | 0.08867 |

|             |         |         |         |
|-------------|---------|---------|---------|
| 87 Ni Ni49  | 0.34374 | 0.27211 | 0.06263 |
| 88 Ni Ni50  | 0.20348 | 0.22910 | 0.13262 |
| 89 Ni Ni51  | 0.06670 | 0.22016 | 0.20716 |
| 90 Ni Ni52  | 0.92871 | 0.41497 | 0.05653 |
| 91 Ni Ni53  | 0.76907 | 0.38725 | 0.10888 |
| 92 Ni Ni54  | 0.63534 | 0.37928 | 0.17506 |
| 93 Ni Ni55  | 0.82048 | 0.61733 | 0.40544 |
| 94 Ni Ni56  | 0.96104 | 0.59301 | 0.33792 |
| 95 Ni Ni57  | 0.09258 | 0.60915 | 0.26417 |
| 96 Ni Ni58  | 0.22654 | 0.60628 | 0.19356 |
| 97 Ni Ni59  | 0.35954 | 0.63691 | 0.11919 |
| 98 Ni Ni60  | 0.50209 | 0.62052 | 0.04667 |
| 99 Ni Ni61  | 0.91952 | 0.80737 | 0.43183 |
| 100 Ni Ni62 | 0.05566 | 0.81793 | 0.37172 |
| 101 Ni Ni63 | 0.19253 | 0.79621 | 0.30358 |
| 102 Ni Ni64 | 0.32686 | 0.78040 | 0.22954 |
| 103 Ni Ni65 | 0.46243 | 0.74755 | 0.16463 |
| 104 Ni Ni66 | 0.59920 | 0.75579 | 0.08872 |
| 105 Ni Ni67 | 0.84370 | 0.77205 | 0.06264 |
| 106 Ni Ni68 | 0.70349 | 0.72908 | 0.13265 |
| 107 Ni Ni69 | 0.56670 | 0.72016 | 0.20716 |
| 108 Ni Ni70 | 0.42872 | 0.91517 | 0.05650 |
| 109 Ni Ni71 | 0.26911 | 0.88728 | 0.10891 |
| 110 Ni Ni72 | 0.13528 | 0.87920 | 0.17480 |
| 111 Ni Ni73 | 0.50000 | 0.37771 | 0.24380 |
| 112 Ni Ni74 | 0.00000 | 0.87771 | 0.24380 |

**Table S8:** The surface structure of  $10^{\overline{1}1}$ -NiP1 optimized in PBE level.

**Unit cell**  $a=12.29177$ ,  $b=5.90239$ ,  $c=29.4000$  Å,  $\alpha=\beta=\gamma=90^{\circ}$ .

| Atom name | x       | y       | z       |
|-----------|---------|---------|---------|
| 1 P P1    | 0.14524 | 0.00865 | 0.15094 |
| 2 P P2    | 0.83996 | 0.00910 | 0.34144 |
| 3 P P3    | 0.55397 | 0.99177 | 0.52659 |
| 4 P P4    | 0.79482 | 0.50534 | 0.05138 |
| 5 P P5    | 0.49332 | 0.51007 | 0.24587 |
| 6 P P6    | 0.19447 | 0.50887 | 0.43670 |
| 7 P P7    | 0.83458 | 0.01050 | 0.13410 |
| 8 P P8    | 0.53154 | 0.01003 | 0.32631 |
| 9 P P9    | 0.23882 | 0.00994 | 0.51901 |
| 10 P P10  | 0.02271 | 0.50886 | 0.11939 |
| 11 P P11  | 0.72389 | 0.51009 | 0.31022 |

|       |      |         |         |         |
|-------|------|---------|---------|---------|
| 12 P  | P12  | 0.42236 | 0.50536 | 0.50470 |
| 13 P  | P13  | 0.66320 | 0.99176 | 0.02950 |
| 14 P  | P14  | 0.37724 | 0.00909 | 0.21464 |
| 15 P  | P15  | 0.07195 | 0.00865 | 0.40514 |
| 16 P  | P16  | 0.47835 | 0.50990 | 0.03707 |
| 17 P  | P17  | 0.18568 | 0.51008 | 0.22978 |
| 18 P  | P18  | 0.88261 | 0.51051 | 0.42198 |
| 19 P  | P19  | 0.29482 | 0.00535 | 0.05139 |
| 20 P  | P20  | 0.99331 | 0.01005 | 0.24586 |
| 21 P  | P21  | 0.69447 | 0.00887 | 0.43670 |
| 22 P  | P22  | 0.64524 | 0.50862 | 0.15094 |
| 23 P  | P23  | 0.33997 | 0.50908 | 0.34144 |
| 24 P  | P24  | 0.05397 | 0.49178 | 0.52659 |
| 25 P  | P25  | 0.97835 | 0.00991 | 0.03707 |
| 26 P  | P26  | 0.68568 | 0.01003 | 0.22978 |
| 27 P  | P27  | 0.38261 | 0.01049 | 0.42198 |
| 28 P  | P28  | 0.16320 | 0.49177 | 0.02950 |
| 29 P  | P29  | 0.87724 | 0.50908 | 0.21464 |
| 30 P  | P30  | 0.57195 | 0.50863 | 0.40515 |
| 31 P  | P31  | 0.52271 | 0.00886 | 0.11939 |
| 32 P  | P32  | 0.22390 | 0.01011 | 0.31022 |
| 33 P  | P33  | 0.92235 | 0.00537 | 0.50470 |
| 34 P  | P34  | 0.33458 | 0.51051 | 0.13410 |
| 35 P  | P35  | 0.03153 | 0.51008 | 0.32631 |
| 36 P  | P36  | 0.73882 | 0.50994 | 0.51901 |
| 37 Ni | Ni1  | 0.26184 | 0.24928 | 0.18365 |
| 38 Ni | Ni2  | 0.95535 | 0.24928 | 0.37244 |
| 39 Ni | Ni3  | 0.81358 | 0.13619 | 0.06121 |
| 40 Ni | Ni4  | 0.51892 | 0.13970 | 0.25301 |
| 41 Ni | Ni5  | 0.21511 | 0.13320 | 0.44210 |
| 42 Ni | Ni6  | 0.90667 | 0.75344 | 0.08586 |
| 43 Ni | Ni7  | 0.60862 | 0.75075 | 0.27805 |
| 44 Ni | Ni8  | 0.31051 | 0.75344 | 0.47022 |
| 45 Ni | Ni9  | 0.61412 | 0.28052 | 0.07543 |
| 46 Ni | Ni10 | 0.32340 | 0.31095 | 0.26822 |
| 47 Ni | Ni11 | 0.01770 | 0.30748 | 0.45480 |
| 48 Ni | Ni12 | 0.83016 | 0.40778 | 0.13272 |
| 49 Ni | Ni13 | 0.53154 | 0.40827 | 0.32631 |
| 50 Ni | Ni14 | 0.23295 | 0.40151 | 0.51017 |
| 51 Ni | Ni15 | 0.00209 | 0.13318 | 0.11398 |
| 52 Ni | Ni16 | 0.69828 | 0.13973 | 0.30307 |
| 53 Ni | Ni17 | 0.40361 | 0.13621 | 0.49488 |
| 54 Ni | Ni18 | 0.04886 | 0.30437 | 0.19309 |
| 55 Ni | Ni19 | 0.74354 | 0.30796 | 0.38309 |
| 56 Ni | Ni20 | 0.64026 | 0.63539 | 0.02712 |

|             |         |         |         |
|-------------|---------|---------|---------|
| 57 Ni Ni21  | 0.35213 | 0.64124 | 0.20682 |
| 58 Ni Ni22  | 0.05050 | 0.64003 | 0.39793 |
| 59 Ni Ni23  | 0.16668 | 0.64003 | 0.15816 |
| 60 Ni Ni24  | 0.86509 | 0.64124 | 0.34926 |
| 61 Ni Ni25  | 0.57691 | 0.63540 | 0.52898 |
| 62 Ni Ni26  | 0.69949 | 0.80747 | 0.10129 |
| 63 Ni Ni27  | 0.39382 | 0.81098 | 0.28787 |
| 64 Ni Ni28  | 0.10308 | 0.78054 | 0.48067 |
| 65 Ni Ni29  | 0.97364 | 0.80794 | 0.17299 |
| 66 Ni Ni30  | 0.66833 | 0.80436 | 0.36300 |
| 67 Ni Ni31  | 0.48420 | 0.90150 | 0.04592 |
| 68 Ni Ni32  | 0.18568 | 0.90832 | 0.22978 |
| 69 Ni Ni33  | 0.88703 | 0.90779 | 0.42335 |
| 70 Ni Ni34  | 0.40667 | 0.25344 | 0.08586 |
| 71 Ni Ni35  | 0.10860 | 0.25074 | 0.27804 |
| 72 Ni Ni36  | 0.81051 | 0.25345 | 0.47022 |
| 73 Ni Ni37  | 0.66667 | 0.14000 | 0.15816 |
| 74 Ni Ni38  | 0.36509 | 0.14123 | 0.34927 |
| 75 Ni Ni39  | 0.07690 | 0.13540 | 0.52898 |
| 76 Ni Ni40  | 0.76184 | 0.74925 | 0.18364 |
| 77 Ni Ni41  | 0.45536 | 0.74925 | 0.37244 |
| 78 Ni Ni42  | 0.47364 | 0.30795 | 0.17300 |
| 79 Ni Ni43  | 0.16833 | 0.30437 | 0.36300 |
| 80 Ni Ni44  | 0.98421 | 0.40150 | 0.04592 |
| 81 Ni Ni45  | 0.68568 | 0.40827 | 0.22978 |
| 82 Ni Ni46  | 0.38703 | 0.40778 | 0.42336 |
| 83 Ni Ni47  | 0.14026 | 0.13540 | 0.02712 |
| 84 Ni Ni48  | 0.85213 | 0.14123 | 0.20681 |
| 85 Ni Ni49  | 0.55051 | 0.14001 | 0.39793 |
| 86 Ni Ni50  | 0.19949 | 0.30748 | 0.10129 |
| 87 Ni Ni51  | 0.89381 | 0.31097 | 0.28787 |
| 88 Ni Ni52  | 0.60308 | 0.28053 | 0.48067 |
| 89 Ni Ni53  | 0.50209 | 0.63317 | 0.11398 |
| 90 Ni Ni54  | 0.19830 | 0.63975 | 0.30308 |
| 91 Ni Ni55  | 0.90361 | 0.63622 | 0.49488 |
| 92 Ni Ni56  | 0.31358 | 0.63619 | 0.06121 |
| 93 Ni Ni57  | 0.01891 | 0.63976 | 0.25301 |
| 94 Ni Ni58  | 0.71511 | 0.63320 | 0.44210 |
| 95 Ni Ni59  | 0.54887 | 0.80432 | 0.19309 |
| 96 Ni Ni60  | 0.24355 | 0.80796 | 0.38309 |
| 97 Ni Ni61  | 0.11412 | 0.78052 | 0.07543 |
| 98 Ni Ni62  | 0.82340 | 0.81101 | 0.26822 |
| 99 Ni Ni63  | 0.51769 | 0.80746 | 0.45480 |
| 100 Ni Ni64 | 0.33017 | 0.90779 | 0.13273 |
| 101 Ni Ni65 | 0.03154 | 0.90832 | 0.32631 |



102 Ni Ni66 0.73295 0.90151 0.51017

**Table S9:** The surface structure of 20<sup>2</sup>1-NiP1 optimized in PBE level.

**Unit cell** a=10.77749, b=5.90239, c= 28.66737 Å,  $\alpha=\beta=\gamma=90^\circ$ .

| <b>Atom name</b> | <b>x</b> | <b>y</b> | <b>z</b> |
|------------------|----------|----------|----------|
| 1 P P1           | 0.79917  | 0.00754  | 0.05505  |
| 2 P P2           | 0.71257  | 0.00816  | 0.17049  |
| 3 P P3           | 0.61826  | 0.00768  | 0.28122  |
| 4 P P4           | 0.52009  | 0.00580  | 0.39298  |
| 5 P P5           | 0.43326  | 0.01317  | 0.50270  |
| 6 P P6           | 0.26301  | 0.51513  | 0.11495  |
| 7 P P7           | 0.16775  | 0.50794  | 0.22486  |
| 8 P P8           | 0.06849  | 0.50687  | 0.33733  |
| 9 P P9           | 0.97303  | 0.50704  | 0.44991  |
| 10 P P10         | 0.90139  | 0.51031  | 0.55264  |
| 11 P P11         | 0.38639  | 0.08922  | 0.04405  |
| 12 P P12         | 0.36951  | 0.00839  | 0.18713  |
| 13 P P13         | 0.26823  | 0.00765  | 0.30004  |
| 14 P P14         | 0.16697  | 0.00692  | 0.41264  |
| 15 P P15         | 0.15003  | 0.08789  | 0.55562  |
| 16 P P16         | 0.63505  | 0.51132  | 0.04713  |
| 17 P P17         | 0.56337  | 0.50734  | 0.14990  |
| 18 P P18         | 0.46830  | 0.50772  | 0.26240  |
| 19 P P19         | 0.36844  | 0.50737  | 0.37477  |
| 20 P P20         | 0.27334  | 0.51436  | 0.48489  |
| 21 P P21         | 0.10343  | 0.01384  | 0.09715  |
| 22 P P22         | 0.01641  | 0.00700  | 0.20705  |
| 23 P P23         | 0.91819  | 0.00773  | 0.31886  |
| 24 P P24         | 0.82434  | 0.00779  | 0.42925  |
| 25 P P25         | 0.73740  | 0.00666  | 0.54482  |
| 26 P P26         | 0.02799  | 0.52393  | 0.02483  |
| 27 P P27         | 0.90230  | 0.50623  | 0.13186  |
| 28 P P28         | 0.81835  | 0.50771  | 0.24358  |
| 29 P P29         | 0.71810  | 0.50771  | 0.35649  |
| 30 P P30         | 0.63430  | 0.50516  | 0.46795  |
| 31 P P31         | 0.50832  | 0.52331  | 0.57496  |
| 32 Ni Ni1        | 0.95363  | 0.25664  | 0.07615  |
| 33 Ni Ni2        | 0.86360  | 0.24533  | 0.18952  |
| 34 Ni Ni3        | 0.76822  | 0.24837  | 0.30004  |
| 35 Ni Ni4        | 0.67346  | 0.24347  | 0.41010  |

|            |         |         |         |
|------------|---------|---------|---------|
| 36 Ni Ni5  | 0.58303 | 0.25600 | 0.52380 |
| 37 Ni Ni6  | 0.29342 | 0.13638 | 0.12063 |
| 38 Ni Ni7  | 0.20155 | 0.13820 | 0.22995 |
| 39 Ni Ni8  | 0.10144 | 0.13733 | 0.34185 |
| 40 Ni Ni9  | 0.00463 | 0.13929 | 0.45336 |
| 41 Ni Ni10 | 0.93441 | 0.14114 | 0.54912 |
| 42 Ni Ni11 | 0.48695 | 0.76912 | 0.04663 |
| 43 Ni Ni12 | 0.41768 | 0.75234 | 0.13169 |
| 44 Ni Ni13 | 0.31836 | 0.74838 | 0.24359 |
| 45 Ni Ni14 | 0.21753 | 0.74783 | 0.35507 |
| 46 Ni Ni15 | 0.11852 | 0.75192 | 0.46834 |
| 47 Ni Ni16 | 0.04945 | 0.76791 | 0.55334 |
| 48 Ni Ni17 | 0.19014 | 0.30819 | 0.05228 |
| 49 Ni Ni18 | 0.08744 | 0.29063 | 0.15659 |
| 50 Ni Ni19 | 0.99750 | 0.30858 | 0.26606 |
| 51 Ni Ni20 | 0.89882 | 0.30754 | 0.37678 |
| 52 Ni Ni21 | 0.80461 | 0.31172 | 0.48692 |
| 53 Ni Ni22 | 0.44184 | 0.40224 | 0.08072 |
| 54 Ni Ni23 | 0.36899 | 0.40640 | 0.18840 |
| 55 Ni Ni24 | 0.26823 | 0.40589 | 0.30004 |
| 56 Ni Ni25 | 0.16822 | 0.40680 | 0.41144 |
| 57 Ni Ni26 | 0.09488 | 0.40125 | 0.51917 |
| 58 Ni Ni27 | 0.60211 | 0.14204 | 0.05077 |
| 59 Ni Ni28 | 0.53225 | 0.13955 | 0.14646 |
| 60 Ni Ni29 | 0.43500 | 0.13736 | 0.25822 |
| 61 Ni Ni30 | 0.33498 | 0.13727 | 0.37017 |
| 62 Ni Ni31 | 0.24352 | 0.13535 | 0.47904 |
| 63 Ni Ni32 | 0.73201 | 0.31256 | 0.11284 |
| 64 Ni Ni33 | 0.63812 | 0.30695 | 0.22331 |
| 65 Ni Ni34 | 0.53895 | 0.30859 | 0.33401 |
| 66 Ni Ni35 | 0.44988 | 0.28902 | 0.44334 |
| 67 Ni Ni36 | 0.34644 | 0.30737 | 0.54745 |
| 68 Ni Ni37 | 0.07290 | 0.63152 | 0.10073 |
| 69 Ni Ni38 | 0.98423 | 0.63775 | 0.20123 |
| 70 Ni Ni39 | 0.88489 | 0.63737 | 0.31468 |
| 71 Ni Ni40 | 0.79166 | 0.63654 | 0.42301 |
| 72 Ni Ni41 | 0.70480 | 0.62129 | 0.53942 |
| 73 Ni Ni42 | 0.83175 | 0.62191 | 0.06032 |
| 74 Ni Ni43 | 0.74457 | 0.63573 | 0.17678 |
| 75 Ni Ni44 | 0.65156 | 0.63738 | 0.28540 |
| 76 Ni Ni45 | 0.55194 | 0.63668 | 0.39879 |
| 77 Ni Ni46 | 0.46356 | 0.63107 | 0.49894 |
| 78 Ni Ni47 | 0.25260 | 0.81237 | 0.06173 |
| 79 Ni Ni48 | 0.19061 | 0.80688 | 0.16838 |
| 80 Ni Ni49 | 0.08909 | 0.80861 | 0.27756 |

|            |          |         |         |
|------------|----------|---------|---------|
| 81 Ni Ni50 | 0.99152  | 0.81028 | 0.38948 |
| 82 Ni Ni51 | 0.88211  | 0.81112 | 0.49568 |
| 83 Ni Ni52 | 0.65442  | 0.81155 | 0.10415 |
| 84 Ni Ni53 | 0.54530  | 0.81132 | 0.21044 |
| 85 Ni Ni54 | 0.44737  | 0.80863 | 0.32252 |
| 86 Ni Ni55 | 0.34430  | 0.80262 | 0.43103 |
| 87 Ni Ni56 | 0.28405  | 0.81158 | 0.53810 |
| 88 Ni Ni57 | -0.00503 | 0.88745 | 0.03723 |
| 89 Ni Ni58 | 0.89858  | 0.90815 | 0.13138 |
| 90 Ni Ni59 | 0.81835  | 0.90594 | 0.24358 |
| 91 Ni Ni60 | 0.71601  | 0.90322 | 0.35457 |
| 92 Ni Ni61 | 0.63774  | 0.90783 | 0.46841 |
| 93 Ni Ni62 | 0.54155  | 0.88657 | 0.56261 |

**Table S10:** The surface structure of 20<sup>23</sup>-NiP1 optimized in PBE level.

**Unit cell** a= 14.46755, b=5.90239, c=24.15687 Å,  $\alpha=\beta=\gamma=90^\circ$ .

| <b>Atom name</b> | <b>x</b> | <b>y</b> | <b>z</b> |
|------------------|----------|----------|----------|
| 1 P P1           | 0.24511  | 0.30150  | 0.04701  |
| 2 P P2           | 0.08622  | 0.31050  | 0.14463  |
| 3 P P3           | 0.92690  | 0.30768  | 0.24215  |
| 4 P P4           | 0.76000  | 0.30768  | 0.34197  |
| 5 P P5           | 0.59930  | 0.30874  | 0.44025  |
| 6 P P6           | 0.43221  | 0.29132  | 0.53788  |
| 7 P P7           | 0.68727  | 0.81018  | 0.08863  |
| 8 P P8           | 0.51237  | 0.80671  | 0.19204  |
| 9 P P9           | 0.34346  | 0.80769  | 0.29207  |
| 10 P P10         | 0.17416  | 0.80809  | 0.39189  |
| 11 P P11         | -0.00142 | 0.80709  | 0.50421  |
| 12 P P12         | 0.83969  | 0.32926  | 0.08710  |
| 13 P P13         | 0.67636  | 0.31144  | 0.19313  |
| 14 P P14         | 0.51013  | 0.30765  | 0.29207  |
| 15 P P15         | 0.34387  | 0.31143  | 0.39100  |
| 16 P P16         | 0.18052  | 0.32928  | 0.49702  |
| 17 P P17         | 0.02160  | 0.80712  | 0.07992  |
| 18 P P18         | 0.84607  | 0.80812  | 0.19224  |
| 19 P P19         | 0.67679  | 0.80772  | 0.29206  |
| 20 P P20         | 0.50784  | 0.80669  | 0.39210  |
| 21 P P21         | 0.33290  | 0.81017  | 0.49551  |
| 22 P P22         | 0.58801  | 0.29130  | 0.04624  |
| 23 P P23         | 0.42092  | 0.30877  | 0.14388  |
| 24 P P24         | 0.26024  | 0.30773  | 0.24216  |

|       |      |         |         |         |
|-------|------|---------|---------|---------|
| 25 P  | P25  | 0.09335 | 0.30773 | 0.34198 |
| 26 P  | P26  | 0.93399 | 0.31051 | 0.43952 |
| 27 P  | P27  | 0.77507 | 0.30145 | 0.53712 |
| 28 P  | P28  | 0.42474 | 0.81225 | 0.04344 |
| 29 P  | P29  | 0.25534 | 0.80283 | 0.14142 |
| 30 P  | P30  | 0.09357 | 0.80771 | 0.24216 |
| 31 P  | P31  | 0.92668 | 0.80771 | 0.34197 |
| 32 P  | P32  | 0.76487 | 0.80281 | 0.44272 |
| 33 P  | P33  | 0.59546 | 0.81221 | 0.54069 |
| 34 Ni | Ni1  | 0.33624 | 0.54705 | 0.08989 |
| 35 Ni | Ni2  | 0.17334 | 0.54562 | 0.19504 |
| 36 Ni | Ni3  | 0.01012 | 0.54837 | 0.29206 |
| 37 Ni | Ni4  | 0.84689 | 0.54561 | 0.38910 |
| 38 Ni | Ni5  | 0.68396 | 0.54701 | 0.49424 |
| 39 Ni | Ni6  | 0.69055 | 0.45138 | 0.10581 |
| 40 Ni | Ni7  | 0.52520 | 0.44052 | 0.20424 |
| 41 Ni | Ni8  | 0.36194 | 0.43733 | 0.30315 |
| 42 Ni | Ni9  | 0.19758 | 0.43833 | 0.40181 |
| 43 Ni | Ni10 | 0.03434 | 0.44818 | 0.50024 |
| 44 Ni | Ni11 | 0.92178 | 0.05438 | 0.05533 |
| 45 Ni | Ni12 | 0.76272 | 0.05293 | 0.14600 |
| 46 Ni | Ni13 | 0.59358 | 0.04838 | 0.24216 |
| 47 Ni | Ni14 | 0.42668 | 0.04838 | 0.34198 |
| 48 Ni | Ni15 | 0.25748 | 0.05291 | 0.43813 |
| 49 Ni | Ni16 | 0.09844 | 0.05435 | 0.52877 |
| 50 Ni | Ni17 | 0.51562 | 0.57464 | 0.09874 |
| 51 Ni | Ni18 | 0.35430 | 0.60006 | 0.20163 |
| 52 Ni | Ni19 | 0.19299 | 0.60858 | 0.30178 |
| 53 Ni | Ni20 | 0.02808 | 0.60620 | 0.39807 |
| 54 Ni | Ni21 | 0.86240 | 0.58600 | 0.49557 |
| 55 Ni | Ni22 | 0.84576 | 0.70863 | 0.09989 |
| 56 Ni | Ni23 | 0.67599 | 0.70967 | 0.19318 |
| 57 Ni | Ni24 | 0.51013 | 0.70589 | 0.29207 |
| 58 Ni | Ni25 | 0.34421 | 0.70966 | 0.39092 |
| 59 Ni | Ni26 | 0.17442 | 0.70860 | 0.48423 |
| 60 Ni | Ni27 | 0.98587 | 0.44821 | 0.08392 |
| 61 Ni | Ni28 | 0.82265 | 0.43833 | 0.18231 |
| 62 Ni | Ni29 | 0.65831 | 0.43736 | 0.28098 |
| 63 Ni | Ni30 | 0.49503 | 0.44053 | 0.37987 |
| 64 Ni | Ni31 | 0.32969 | 0.45141 | 0.47832 |
| 65 Ni | Ni32 | 0.15780 | 0.58605 | 0.08856 |
| 66 Ni | Ni33 | 0.99214 | 0.60617 | 0.18608 |
| 67 Ni | Ni34 | 0.82726 | 0.60859 | 0.28235 |
| 68 Ni | Ni35 | 0.66592 | 0.60007 | 0.38250 |
| 69 Ni | Ni36 | 0.50460 | 0.57468 | 0.48536 |

|            |         |         |         |
|------------|---------|---------|---------|
| 70 Ni Ni37 | 0.56681 | 0.92777 | 0.04399 |
| 71 Ni Ni38 | 0.40598 | 0.92741 | 0.13611 |
| 72 Ni Ni39 | 0.24176 | 0.93737 | 0.23108 |
| 73 Ni Ni40 | 0.07487 | 0.93737 | 0.33089 |
| 74 Ni Ni41 | 0.91444 | 0.92740 | 0.42996 |
| 75 Ni Ni42 | 0.73846 | 0.94893 | 0.52540 |
| 76 Ni Ni43 | 0.28174 | 0.94899 | 0.05873 |
| 77 Ni Ni44 | 0.10576 | 0.92740 | 0.15417 |
| 78 Ni Ni45 | 0.94538 | 0.93738 | 0.25324 |
| 79 Ni Ni46 | 0.77848 | 0.93738 | 0.35305 |
| 80 Ni Ni47 | 0.61421 | 0.92739 | 0.44803 |
| 81 Ni Ni48 | 0.45340 | 0.92777 | 0.54013 |
| 82 Ni Ni49 | 0.72799 | 0.12096 | 0.04701 |
| 83 Ni Ni50 | 0.57808 | 0.11562 | 0.13808 |
| 84 Ni Ni51 | 0.41071 | 0.10861 | 0.23245 |
| 85 Ni Ni52 | 0.24382 | 0.10861 | 0.33226 |
| 86 Ni Ni53 | 0.07567 | 0.13094 | 0.42611 |
| 87 Ni Ni54 | 0.91196 | 0.13957 | 0.52000 |
| 88 Ni Ni55 | 0.10824 | 0.13960 | 0.06415 |
| 89 Ni Ni56 | 0.94453 | 0.13081 | 0.15800 |
| 90 Ni Ni57 | 0.77644 | 0.10863 | 0.25187 |
| 91 Ni Ni58 | 0.60954 | 0.10863 | 0.35169 |
| 92 Ni Ni59 | 0.44215 | 0.11570 | 0.44604 |
| 93 Ni Ni60 | 0.29224 | 0.12103 | 0.53711 |
| 94 Ni Ni61 | 0.43448 | 0.19896 | 0.05601 |
| 95 Ni Ni62 | 0.25599 | 0.20465 | 0.14576 |
| 96 Ni Ni63 | 0.09358 | 0.20594 | 0.24216 |
| 97 Ni Ni64 | 0.92668 | 0.20594 | 0.34197 |
| 98 Ni Ni65 | 0.76422 | 0.20459 | 0.43837 |
| 99 Ni Ni66 | 0.58572 | 0.19895 | 0.52813 |

**Table S11:** Atomic displacements along the surface normal upon the surface relaxation; relative shifts of atoms are reported (in Å) for the (0001)-A, (0001)-B, (0001)-A-P, (10 $\bar{1}$ 0)-AB, and (10 $\bar{1}$ 0)-BA-P surfaces with respect to Ni<sub>2</sub>P bulk interlayer distances.

|                       | $d_{P1-P2}$ | $d_{P1-Ni1}$         | $d_{P2-Ni2}$         | $d_{P3-Ni3}$         | $d_{P4-Ni4}$         |
|-----------------------|-------------|----------------------|----------------------|----------------------|----------------------|
| (0001)-A              |             | 0.155                | 0.079                | 0.002                | 0.005                |
| (0001)-B              |             | 0.371                | 0.190                | 0.009                | 0.027                |
| (0001)-A-P            | -0.217      |                      | 0.210                | 0.030                | 0.034                |
|                       | $d_{P1-P2}$ | $d_{P1-Ni1-1/Ni1-2}$ | $d_{P2-Ni2-1/Ni2-2}$ | $d_{P3-Ni3-1/Ni3-2}$ | $d_{P4-Ni4-1/Ni4-2}$ |
| (10 $\bar{1}$ 0)-AB   |             | 0.150/0.474          | 0.120/-0.029         | 0.004/-0.084         | 0.015/0.010          |
| (10 $\bar{1}$ 0)-BA-P | -0.399      |                      | -0.014/-0.343        | 0.065/0.116          | 0.045/0.037          |
